1 **The evolution of micro-cursoriality in mammals**

2

3 **Barry, G. Lovegrove and Metobor, O. Mowoe**

4

5 *School of Life Sciences, University of KwaZulu-Natal, Private Bag X01, Scottsville, 3209.*

6 *Email: [lovegrove@ukzn.ac.za](mailto:lovegrove@ukzn.ac.za); [m\\_mowoe@yahoo.co.uk](mailto:m_mowoe@yahoo.co.uk)*

7

8 **Keywords:** Elephant-shrews, Macroscelidae, running speed, cursors, mammals

9

10 **Running head:** Running speeds of elephant-shrews

11

12 **Abstract**

13

14 In this study we report on the evolution of micro-cursoriality, a unique case of cursoriality in  
15 mammals smaller than 1 kg. We obtained new running speed and limb morphology data for  
16 two species of elephant-shrews (*Elephantulus* spp., Macroscelidae) from Namaqualand,  
17 South Africa, which we compared with published data for other mammals. *Elephantulus*  
18 maximum running speeds were higher than most mammals smaller than 1 kg. *Elephantulus*  
19 also possess exceptionally high metatarsal:femur ratios (1.07) that are typically associated  
20 with fast unguligrade cursors. Cursoriality evolved in the Artiodactyla, Perissodactyla, and  
21 Carnivora coincident with global cooling and the replacement of forests with open landscapes  
22 in the Oligocene and Miocene. The majority of mammal species, though, remained non-  
23 cursorial, plantigrade, and small (< 1 kg). The extraordinary running speed and digitigrady of  
24 elephant-shrews was established in the Early Eocene in the earliest macroscelid *Prodiacodon*,  
25 but was probably inherited from Paleocene, Holarctic stem macroscelids. Micro-cursoriality  
26 in macroscelids evolved from the plesiomorphic plantigrade foot of the possum-like ancestral  
27 mammal earlier than in other mammalian crown groups. Micro-cursoriality evolved first in  
28 forests, presumably in response to selection for rapid running speeds facilitated by local  
29 knowledge, in order to avoid predators. During the Miocene, micro-cursoriality was pre-  
30 adaptive to open, arid habitats, and became more derived in the newly-evolved *Elephantulus*  
31 and *Macroscelides* elephant-shrews with trail running.

32

33 **List of abbreviations**

34

35 K-Pg: Cretaceous-Paleogene boundary

36 mya: millions of year ago

37 MT: metatarsal

38 F: femur

39 MT:F: metatarsal:femur ratio

40 MRS: maximum running speed ( $\text{km h}^{-1}$ )

41 RRS: relative running speed ( $\text{body lengths sec}^{-1}$ )

42  $T_b$ : body temperature ( $^{\circ}\text{C}$ )

43 OLS: ordinary least squares

44 PGLS: phylogenetic generalized least squares

45 AIC: Akaike information criterion

46  $M_b$ : body mass

47 ML: maximum likelihood

48 CI: confidence interval

49 MANOVA: multivariate analysis of variance

## 50 **Introduction**

51

52 The extraordinary diversity of modern placental mammals evolved from a single lineage  
53 which survived the asteroid impact event that drove the nonneornitheathean dinosaurs to  
54 extinction at the Cretaceous-Paleogene (K-Pg) boundary 65.5 million years ago (mya)  
55 (O'Leary et al., 2013). The ancestral placental mammal was a small (6 - 245g), insectivorous,  
56 tree-climbing (scansorial), forest-dweller, which looked somewhat like an opossum with a  
57 bushy tail (O'Leary et al., 2013). The reconstruction of this virtual placental mammalian  
58 ancestor shows the ancestral condition of a plantigrade foot, in which the heel makes contact  
59 with the ground (O'Leary et al., 2013). From this ancestor, and given the freedom to radiate  
60 into niches evacuated by the nonneornitheathean dinosaurs, the first members of the modern  
61 placental mammals emerged within hundreds of thousands of years of the extinction event  
62 (O'Leary et al., 2013). During the Oligocene and Miocene, a high degree of cursoriality  
63 evolved in several modern placental orders (Carnivora, Artiodactyla, and Perissodactyla) in  
64 response to the emergence of open landscapes and grasslands following the Eocene Thermal  
65 Maximum (Janis, 1993; Janis and Wilhelm, 1993; Yuanqing et al., 2007; Jardine et al., 2012;  
66 Lovegrove, 2012b; Lovegrove and Mowoe, 2013).

67 Loosely defined, cursorial mammals are those that run fast. However, more explicit  
68 definitions of cursoriality remain obscure because locomotor performance is influenced by  
69 multiple variables, including behaviour, biomechanics, physiology, and morphology (Taylor  
70 et al., 1970; Garland, 1983a, b; Garland and Janis, 1993; Stein and Casinos, 1997; Carrano,  
71 1999). In an evaluation of these definition problems, Carrano (1999) argued that  
72 "...morphology should remain the fundamental basis for making distinctions between  
73 locomotor performance..." (Carrano, 1999). Carrano (1999) showed that a morphological  
74 continuum between "cursorial" and "graviportal" (weight-bearing) locomotion based upon  
75 measures of multiple morphological traits in an principal components analysis provided  
76 biologically realistic indices of mammalian locomotor performance. In short, cursorial taxa  
77 have longer metatarsals, more slender limb elements, shorter femora, and a muscle insertion  
78 point located closer to the hip joint, whereas graviportal mammals have more robust limb  
79 elements, shorter metatarsals, and more distal muscle insertion points (Carrano, 1999).

80 Variations in the dimensions of these traits are borne in limbs commonly associated  
81 with cursoriality, namely the derived digitigrade and unguligrade limbs, in which the  
82 metatarsals, in particular, are elongated relative to other hindlimb bones, resulting in the heel  
83 being raised off the ground (Hildebrand, 1974; Garland and Janis, 1993). The length ratio

84 between the metatarsals (MT) and the femur (F), the MT:F ratio, is often used as a proxy for  
85 cursoriality in mammals (Garland and Janis, 1993; Carrano, 1999). Although higher MT:F  
86 ratios are often associated with increased hindlimb length, stride length and running speed  
87 (Hildebrand, 1974), they are also indicative of more specialized limb adaptations for fast  
88 running speeds (Stuedel and Beattie, 1993) and cost-effective long-distance locomotion  
89 (Garland and Janis, 1993). Nevertheless, there is no direct relationship between MT:F ratio  
90 and maximum running speed; two mammals with similar body sizes can have similar  
91 maximum running speeds but very different MT:F ratios (Garland and Janis, 1993). MT:F  
92 ratios range from  $< 0.1$  in some plantigrade rodents to 1.4 in the giraffe (Carrano, 1999).

93 Several published observations on the morphology and physiology of elephant-shrews  
94 or sengis (Macroscelidea) prompted us to test the hypothesis that elephant-shrews are  
95 exceptional micro-cursors relative to typical cursors. Elephant-shrews are placed in the  
96 superorder Afrotheria (Springer et al., 1997) as a sister family to Afrosoricida (tenrecs,  
97 golden moles and otter shrews) (Stanhope et al., 1998). The etymology of Macroscelidea  
98 confirms the early recognition of unusual hind limb morphology because the word is derived  
99 from *Macroscelides* comprised of the Latin prefix “macro” meaning large, and the Greek  
100 word “skelis”, meaning hip or thigh. Indeed, elephant-shrews that have been studied  
101 morphologically to-date display extremely elongated metatarsals and distal muscle reductions  
102 (Evans, 1942; Carrano, 1999). Moreover, whereas their closest relatives, tenrecs (Tenrecidae)  
103 and golden moles (Chrysochloridae), display a mean body temperature ( $T_b$ ) of  $32.8^\circ\text{C}$  ( $n = 8$   
104 species), the mean  $T_b$  of elephant-shrews is  $37.2^\circ\text{C}$  ( $n = 8$  species), indicating a profound  
105 apomorphy (derived characteristic) of  $4.4^\circ\text{C}$  between sister Afrotherians (Lovegrove, 2012a;  
106 Lovegrove, 2012b) (see Fig. 1, supplementary information). High body temperatures are  
107 correlated with the MT:F in other cursors (Lovegrove, 2012b), and are thought to enhance  
108 muscle performance (Clarke and Pörtner, 2010). Elephant-shrews also display an  
109 exceptionally high MT:F ratio for their body size, comparable to those of the fastest  
110 unguligrade cursors (Lovegrove, 2012b). Last, elephant-shrews (*Elephantulus*) displayed the  
111 highest index of cursoriality in a principal components analysis of mammal limb dimensions  
112 (Carrano, 1999).

113 The extraordinary large hind limbs/quarters and speed of elephant-shrews were also  
114 recognized in the very first written description of these African small mammals an annotation  
115 that accompanied a drawing now thought to have been that of *Macroscelides proboscideus*  
116 (Rookmaker, 1989). It was recorded during the fourth journey into the northwestern Cape of  
117 South Africa by Robert Jacob Gordon on 02 August 1779;

118

119 “Door mij, *oliphantsmuis* genaamt, om sign lange snuit dewelke hij op allerley manieren  
120 bewegen kan, sijn voorpoten veel korter als de agterpoten. Is egter seer geswind in het  
121 lopen,...

122

123 The English translation reads;

124

125 “By me, called *oliphantsmuis* (elephant mouse), for the long snout which can be moved in  
126 many ways. Its front legs much shorter than the hind ones. It is very fast...”

127

128 The limbs and other unique characteristics of elephant-shrews (exposed shelter sites, mixed  
129 herbivory and insectivory, social monogamy, small precocial litters, and small body size < 1  
130 kg), have been described as “the micro-cursorial adaptive syndrome” (Rathbun, 1979, 2009).

131 Two ecologically relevant measures of running speed; maximum running speed  
132 (MRS; km/h), and relative running speed (RRS, body lengths/s) have been used in the  
133 literature (Van Damme and Van Dooren, 1999; Iriarte-Diaz, 2002). On average, large  
134 mammals display higher MRSs than small mammals (Garland, 1983a), whereas small  
135 mammals display higher RRSs than large mammals (Steudel and Beattie, 1993; Iriarte-Diaz,  
136 2002). The regression of RRS as a function of body mass ( $M_b$ ) has a negative slope, and  
137 displays an inflection at a  $M_b$  of  $\sim 500$  g, i.e. the negative slope of the regression for  
138 mammals larger than 500 g is steeper, which the authors suggest confirms that RRS decreases  
139 more rapidly with increasing body size (Iriarte-Diaz, 2002). However, although we accept the  
140 concept of relative running speed as a notable ecological consideration, the allometric scaling  
141 patterns that have been reported and which quantify RRS are questionable because two body-  
142 size related variables ( $\log$  body lengths. $s^{-1}$  and  $M_b$ ) were regressed against each other (Iriarte-  
143 Diaz, 2002). Consequently, we resorted here to analyses of MRS only, using a  
144 phylogenetically-informed approach.

145

146 In this study we measured the running speeds and limb morphology of two species of  
147 rock elephant-shrew, *Elephantulus edwardii* and *E. rupestris*, from Namaqualand, South  
148 Africa. We recorded the MT:F ratio and maximal running speed ( $\text{km}\cdot\text{h}^{-1}$ ) and compared these  
149 data with appropriate mammal models for which running speed and MT:F data were  
150 available. We tested the hypothesis that elephant-shrews display a micro-cursorial capacity  
151 which evolved in forest environments with some surety during the Early Eocene, but possibly  
as early as the Paleocene.

152

153 **Results**

154

155 *Metatarsal:femur ratios*156 The average metatarsal:femur ratio of the two species of *Elephantulus* was 1.07 (Table 1).

157 Excluding the giraffe, only five mammals in the combined dataset of 135 mammals had

158 MT/F ratios higher than those of the *Elephantulus* species (3 *Gazella* spp., the dik dik159 *Madoqua kirkii*, and the springbok *Antidorcas marsupialis*) (Fig. 1). No mammal smaller160 than 1 kg, apart from *Elephantulus*, showed a MT:F ratio > 0.7 (Fig. 1). A statistical161 comparison of the MT:F ratios of *Elephantulus* with those of other mammals is quite162 unnecessary because the data for *Elephantulus* are so markedly higher than those of other

163 similar-sized mammals (Fig. 1). Nevertheless, we report the results of the ordinary least

164 squares (OLS) and the phylogenetic generalized least squares (PGLS) models fitted to the

165 data because they bear relevance to previous studies which found no significant allometric

166 relationships.

167 The OLS and PGLS regressions of MT:F ratio as a function of  $\log_{10}M_b$  of the168 complete dataset ( $n = 135$ ) were significant (Table 2). However, whereas the slope of the

169 OLS regression was positive, i.e. indicating an increase in MT:F ratio with body size (not

170 shown in Fig. 1), those of the phylogenetic regressions were negative, consistent with the

171 negative slopes for the separate unguligrade and non-unguligrade regressions (see below).

172 Thus the positive slope of the OLS regression, plus the large values of  $\Delta AIC > 200$  between

173 the OLS and the PGLS regressions, render the OLS regression meaningless. The PGLS with

174 maximum likelihood (ML) estimation showed the best fit to the data (Fig. 1, red line) and

175 also showed significant phylogenetic signal [ $\lambda = 0.964$ , significantly different to both  $\lambda = 0$ ,176 lower 95% confidence interval (CI) = 0.901, and  $\lambda = 1$ , upper 95% CI = 0.997] close to, but

177 not quite equal to, a Brownian motion evolutionary model (Table 2).

178 There was significant phylogenetic signal for both  $M_b$  and residual MT:F ratio in

179 the unguligrade and non-unguligrade datasets (Table 3). The best fitting regression models

180 for the 56 species of unguligrade mammal were the two PGLS regression ( $\Delta AIC = 54.9$ 

181 compared with the OLS regression) which both indicated a Brownian motion model of

182 evolution ( $\lambda = 1$ , Table 2, Fig. 1). For the 79 non-unguligrade mammals, the PGLS with ML

183 estimation provided the best fit to the data (Fig. 1) and confirmed significant phylogenetic

184 signal ( $\lambda = 0.589$ , lower 95% CI = 0.279, upper 95% CI = 0.819, Table 2). The slope of the

185 unguigrade PGLS regression (-0.124) was steeper than that of the non-unguigrade PGLS  
186 regression (-0.031) (Table 2, Fig. 1).

187

### 188 *Maximum running speed model*

189 The mean MRSs of *E. rupestris* and *E. edwardii* were 23.6 km/h and 19.4 km/h, respectively  
190 (Table 1). The fastest individual run recorded was 28.8 km/h by a female *E. rupestris*.

191 Piecewise regression identified a significant inflection in the regression of  $\log_{10}$  MRS  
192 as a function of  $\log_{10}$   $M_b$  of 143 species of mammals (excluding *Elephantulus* spp.) ranging in  
193  $M_b$  from 9 g (*Perognathus longimembris*) to 6,000 kg (*Loxodonta africana*) (Fig. 2). The  
194 inflection occurred at a body mass of 20 kg. The largest mammal in the small mammal data  
195 set was the Cape hunting dog (*Lycaon pictus*). The 80 species < 20 kg were comprised of 49  
196 rodents, 8 lagomorphs, 12 marsupials, 10 carnivores and one artiodactyl (*Madoqua kirkii*).  
197 Both  $\log_{10}$   $M_b$  and residual  $\log_{10}$  MRS showed significant phylogenetic signal as detected by  
198 Blomberg et al.'s (2003)  $K$  estimate (Table 3).

199 In the significant OLS regression of the small mammal data there were no outliers,  
200 that is, no studentized residuals > 3 (Jones and Purvis, 1997) or Cook's Distance  $D$  values >  
201 0.5. Four of the five species with the highest studentized residuals were lagomorphs, whereas  
202 those with the lowest residuals were the ground hog *Marmota monax*, the striped skunk  
203 *Mephitis mephitis*, and the western pygmy possum *Cercartetus concinnus*.

204 The presence of so many lagomorphs with high MRS residuals suggested that there  
205 may be differences in the MRS between the four locomotor modes. A non-PGLS multivariate  
206 MANOVA confirmed a significant effect of locomotor mode on MRS (Table 4). We omitted  
207 the solitary unguigrade datum (*Madoqua*) from the multivariate MANOVAs of the small  
208 mammal dataset because of sample size. Once corrected for phylogenetic effects, the PGLS  
209 multivariate MANOVA showed no significant influence of locomotor mode on MRS (Table  
210 4). Thus the model against which the elephant-shrew MRSs were initially compared was  
211 comprised of 80 mammals smaller than 20 kg which included all locomotor modes  
212 (plantigrade, digitigrade, lagomorph-like, and saltatorial), but excluded the solitary  
213 unguigrade datum for *Madoqua*. Both body mass and residual MT:F ratio in this dataset  
214 showed significant phylogenetic signal (Table 3).

215 The phylogenetic PGLS Brownian motion regression model of the small mammal  
216 data was significant and its AIC value was lower than that of the OLS regression ( $\Delta AIC =$   
217 18.88, Table 5). Thus a Brownian motion evolutionary model provided a considerably better  
218 fit to the data than a model that assumed no phylogenetic structure (star phylogeny).



219 However, the evolutionary model with the lowest AIC, and hence the best fit of the models,  
220 was the PGLS model in which the branch length transformations were estimated with Pagel's  
221  $\lambda$  ( $\lambda = 0.905$ , significantly  $> 0$ , lower 95% CI = 0.699, and  $< 1$ , upper 95% CI = 0.988,  
222 Table 5), confirming significant phylogenetic signal. To our knowledge, there is no way of  
223 fitting 95% confidence and prediction intervals to a PGLS regression with ML estimated  
224 branch length transformations that would allow a comparison of the MRS of elephant-shrews  
225 with those of mammals smaller than 20 kg.

226 We resorted instead to fitting the 95% confidence and prediction intervals to a  
227 Brownian motion PGLS, which is equivalent to fitting an OLS to the phylogenetically  
228 independent linear contrasts (Blomberg et al., 2012) (Fig. 3). In this graphical representation,  
229 the most obvious observations were that a) the MRS of 7 of the 8 lagomorphs lay above the  
230 upper 95% confidence interval, and b) the digitigrade mammals and lagomorphs showed a  
231 marginal body size overlap with the plantigrade mammals (non-sciurids rodents, sciurids, and  
232 marsupials); three squirrels and a primate did overlap. Thus, as stated earlier, a lack of body  
233 overlap obviates a comparison of the MRSs of elephant-shrews with digitigrade mammals  
234 and carnivora. The data for *Elephantulus* lay above the regression line, but not above the 95%  
235 confidence intervals (Fig. 3).

236 There were 52 species in the plantigrade database that were smaller than 0.5 kg (44  
237 rodents and 8 marsupials). Interestingly, there was no significant phylogenetic signal for  
238 residual  $\log_{10}$  MRS using both Blomberg et al.'s (2003)  $K$  estimate, as well as Pagel's ML  
239  $\lambda$  which was not significantly different to 0 ( $p = 1$ ), but significantly different 1 ( $p <$   
240  $0.001$ ). Not surprisingly, the OLS of the MRS of these mammals was significant, but none of  
241 the PGLS models showed significance. When the data for *Elephantulus* were mapped back  
242 onto the OLS regression, the datum for *E. rupestris* lay above both the 95% confidence and  
243 prediction intervals, indicating a significantly higher MRS than other plantigrade small  
244 mammals (Fig. 4). The two larger species with absolute MRSs slightly higher than that of *E.*  
245 *rupestris* were the marsupial *Dasyuroides byrnei*, and the squirrel, *Sciurus carolinensis*.

246

## 247 **Discussion**

248

### 249 *MT:F ratios*

250 Although it was not a specific objective of this study to evaluate the allometry of  
251 MT:F ratios, the results of our analyses are noteworthy. Garland and Janis (1993) analyzed  
252 the MT:F ratio allometry in 49 mammal species, 30 ungulates and 19 carnivores, and found



253 no significant phylogenetically-corrected relationship between MT:F ratio and  $\log_{10}M_b$  in any  
254 of their regressions (complete dataset, ungulates, carnivores). In our expanded, more  
255 taxonomically diverse dataset ( $n = 135$  species), all of our phylogenetically-corrected  
256 regressions showed significant allometries of MT:F ratio and  $\log_{10}M_b$ . With the exception of  
257 the *Elephantulus* data, the data fall neatly into either the unguligrade or non-unguligrade  
258 distributions. Although we did not test for interordinal differences within the non-unguligrade  
259 mammals, it would seem that carnivores and lagomorphs, for example, both considered to be  
260 cursorial, do not display MT:F ratios obviously different from other non-unguligrade  
261 mammals, such as primates and non-macropod marsupials, that are considered to be non-  
262 cursorial.

263         These data emphasize that the MT:F ratio of mammals smaller than 1 kg never  
264 exceeds 0.7, whereas it does in larger unguligrade mammals. Thus cursoriality never evolved  
265 in the majority of mammals, that is, those smaller than 1 kg (see Lovegrove and Mowoe,  
266 2013). On the other hand, the rates of evolution of cursoriality as measured by the MT:F ratio  
267 accelerated during the Oligocene and Miocene in typical large-bodied herbivorous cursors  
268 (Garland and Janis, 1993; Janis and Wilhelm, 1993).

269         The negative slope of the allometry for unguligrade mammals that we report here can  
270 probably be attributed to the continuum of morphological traits along the cursorial-  
271 graviportal continuum (Carrano, 1999). In terms of fitness, longer metatarsals, more slender  
272 limb elements, shorter femora, and muscle insertion points located closer to the hip joint  
273 evolved in the smallest unguligrade mammals because weight bearing was less important  
274 than maximum running speed. Consequently, small ungulates also have a higher maximum  
275 running speed than big ungulates (Garland, 1983a; Lovegrove, 2004).

276         The allometry of the non-unguligrade mammals is hardly worthy of mention because  
277 the slope of the best-fit regression is so low despite being significantly different from zero.  
278 Moreover, there seems to be no consistent taxonomic trend in MT:F ratios in these data. For  
279 example, the species with the top 10 highest ratios (0.490 – 0.649) include six rodents, one of  
280 which is saltatorial (*Dipodomys*), the saltatorial marsupial *Bettongia penicullta*, one  
281 lagomorph, *Lepus americanus*, one lipotyphlan, *Sorex cinereus*, and one carnivore, *Felis*  
282 *nigripes*.

283         We offer one explanation for the difference in the MT:F ratio of similar-sized  
284 unguligrade and non-unguligrade mammals; the evolutionary tradeoff between locomotor  
285 performance and digit functionality (Lovegrove and Mowoe, 2013). The tradeoff posits that  
286 the fitness benefits of unguligrady in herbivores far outweighed the fitness costs of the loss of

287 digit numbers and functionality, which was not the case in carnivores (Lovegrove and  
288 Mowoe, 2013). The divergence in MT:F ratios occurred in the Oligocene and Miocene when  
289 there was a dramatic acceleration in the rate of evolution of the MT:F ratio in herbivores, but  
290 not in carnivores (Garland and Janis, 1993; Janis and Wilhelm, 1993), despite the fact that  
291 both herbivores and carnivores were also increasing in body size (Lovegrove and Mowoe,  
292 2013).

293 Relative to other similar-sized mammals, elephant-shrews, such as *E. ruprestris*,  
294 display remarkable digitigrade-like adaptations of the limbs. The metatarsal:femur ratios of  
295 the elephant-shrews were more than double the average for 24 other species (0.42) of small  
296 mammals < 1 kg, but were comparable with some of the highest of all mammalian ratios,  
297 namely those of the cursorial Artiodactyla > 1 kg. *Elephantulus* elephant-shrews also  
298 displayed maximum running speeds faster than those of all mammals smaller than 1 kg,  
299 except for a larger squirrel and a marsupial. These fast running speeds can undoubtedly be  
300 attributed to the digitigrady of *Elephantulus* as quantified by their very high MT:F ratios for  
301 such small mammals. No other mammal smaller than 1 kg has a MT:F which exceeds 0.7.  
302 Thus elephant-shrews are not only the smallest mammalian cursors, they can also run faster  
303 than the majority of mammals smaller than 1 kg.

304

### 305 *Maximum running speeds*

306 In absolute terms, the MRSs of elephant-shrews were comparable with those of larger  
307 digitigrade carnivores, but they were not as fast as lagomorphs, although these differences  
308 could not be quantified or tested statistically. Nevertheless, these observations, as well as the  
309 observation of comparatively slow MRSs in plantigrade mammals smaller than 1 kg  
310 (Lovegrove, 2004), supports several hypotheses on the relationship between the evolution of  
311 limb morphology and body size in mammals during the Cenozoic (Lovegrove, 2000, 2001,  
312 2004; Lovegrove and Haines, 2004; Lovegrove, 2012b; Lovegrove and Mowoe, 2013). For  
313 example, the Bowtie Model argued that, following the evolution of larger, faster digitigrade  
314 carnivores following the Eocene Thermal Maximum, most plantigrade mammals were  
315 constrained from evolving to body sizes larger than ~ 0.5 kg (Lovegrove, 2000, 2001;  
316 Lovegrove and Mowoe, 2013). Exceptions occurred with the evolution of body armour,  
317 arboriality, an aquatic lifestyle, or exceptionally fast running speeds, such as occurs in the  
318 lagomorpha (Garland, 1983a; Lovegrove, 2001). But elephant-shrews are somewhat  
319 enigmatic in terms of these mammalian generalizations concerning body size and running

320 speed because they are the only mammals in which digitigrady and high running speeds, that  
321 is, micro-cursoriality, evolved in small mammals.

322

### 323 *The evolution of micro-cursoriality in elephant-shrews*

324 The evolution of widespread cursoriality, especially unguligrady, was driven by Cenozoic  
325 cooling and the appearance of more open landscapes and C<sub>4</sub> grasslands following the Eocene  
326 Thermal Maximum (ca. 55 mya), especially during the Miocene (Janis and Wilhelm, 1993;  
327 Edwards et al., 2010; Figueirido et al., 2012; Lovegrove, 2012b; Secord et al., 2012;  
328 Lovegrove and Mowoe, 2013). Moreover, during the Late Cenozoic, both unguligrade and  
329 digitigrade mammals showed body size increases (Alroy, 1998; Smith and Lyons, 2011;  
330 Lovegrove and Mowoe, 2013) and increased hypsodonty in unguligrade mammals  
331 (MacFadden, 2000; Jardine et al., 2012). Nevertheless, although unguligrady and digitigrady  
332 were synonomous with several crown orders (Carnivora, Artiodactyla, Perissodactyla), the  
333 most common condition remained plesiomorphic plantigrady (Lovegrove and Mowoe, 2013).  
334 During the dramatic radiation of the mammals within several 100,000 years of the T-Pg  
335 boundary (O'Leary et al., 2013), the evolution of digitigrady occurred surprisingly quickly in  
336 “condylarths” (e.g. Phenacodontidae), ancestral lagomorphs (e.g. *Gomphos*), and perhaps the  
337 Macroscelidea.

338         Understanding the evolution of micro-cursoriality in elephant-shrews is complicated  
339 by uncertainty in the phylogenetic relationships between the Macroscelidea and North  
340 American “condylarths” (Aphelescidae, Louisinidae, Amphilemuridae and Adapisoridae)  
341 (Zack et al., 2005b; Zack et al., 2005a; Hooker and Russell, 2012; O'Leary et al., 2013).  
342 Based upon cladistic analyses, Hooker & Russel (2012) argued that the Macroscelidea  
343 evolved from Paleocene, Holarctic “condylarths”, many of which, they argue, are basal  
344 macroscelideans (Fig. 5) (Zack et al., 2005b; Hooker and Russell, 2012). They suggested  
345 placing Aphelescidae within Macroscelidea, together with Louisinidae, Amphilemuridae and  
346 Adapisoridae. They dated the basal divergence of the Macroscelidea to the K-Pg boundary ~  
347 65 mya (Fig. 5) (Hooker and Russell, 2012).

348         On the other hand, both O'Leary et al.'s (2013) combined phenomic/genomic  
349 phylogeny and Zack et al.'s (2005b) phylogeny, consider *Apheliscus* (Aphelescidae) to be a  
350 North American ungulate basal to Euungulata (= crown Perrisodactyla and Artiodactyla).  
351 Rare postcranial skeletons show cursorial specializations of the femur, tibiofibula (distal  
352 synostosis, Fig. 6), and the crus of the Paleocene aphelescines *Apheliscus* and *Haplomylus*  
353 (Zack et al., 2005b). Tibiofibular synostosis, in particular, is associated with enhanced

354 parasagittal, cursorial capacity (Zack et al., 2005b). The *Apheliscus* fossil is dated at 55.8  
355 mya and the split of Aphelescidae with Hyopsodontidae at 63.3 mya (O'Leary et al., 2013).  
356 Interestingly, *Hyopsodus* (Hyopsodontidae) had a long dachshund-like body with short legs  
357 and no morphological evidence of cursorial capacity (Zack et al., 2005b). However, other  
358 closely related families, such as Phenacodontidae and Didolodontidae, tended towards  
359 digitigrade cursoriality (Thewissen, 1990), so the possibility that the ancestral euungulate  
360 “condylarth” may have been digitigrade cannot be ruled out. The point we wish to emphasize  
361 here is that the Early Eocene origin of *Apheliscus*, as well as the questionable phylogenetic  
362 placement of the Aphelescidae, does not detract from the development of our argument for an  
363 Early Eocene or perhaps even a Paleocene origin of micro-cursoriality in Macroscelidea.

364 There seems to be agreement that the Leptictidae, which were small, insectivorous  
365 saltatorial (jumping) and/or cursorial mammals, are the sister clade to Macroscelidea (Hooker  
366 and Russell, 2012; O'Leary et al., 2013) (Fig. 5). The hindlimbs of *Leptictis* and *Leptiptidium*  
367 show a degree of fibiotibular fusion (Rose, 1999, 2006) that is remarkably similar to the  
368 condition in modern elephant shrews, for example *Rhynchocyon* (Zack et al., 2005b) and  
369 *Elephantulus* (this study) (Fig. 6). Thus we need to ask whether micro-cursoriality was  
370 derived independently in the Macroscelidea and Leptictidae, or whether it was inherited from  
371 a common Early Paleocene ancestor.

372 The date of the oldest leptictid, *Prodiacodon crustuluam*, cannot be separated from  
373 that of the Afrotherian origin or the Early Paleocene split between the Leptictidea and the  
374 Macroscelidea, ca. 65 mya (Fig. 5) (O'Leary et al., 2013). Thus if micro-cursoriality was an  
375 inherited trait in the macroscelid and leptictid lineages it would have evolved in the Early  
376 Paleocene, very soon after the K-Pg extinction event. However, the postcrania of  
377 *Prodiacodon* show fusion of the tibia and fibula at the distal end only, “...well below  
378 midshaft...”, indicating an ancestral synostotic condition (i.e. non-cursorial hindlimb)  
379 compared with Eocene leptictids (Rose, 2006). Thus in the leptictid lineage, micro-  
380 cursoriality seems to have evolved for the first time in the Eocene.

381 The oldest macroscelid is thought to be *Chambius kasserinensis* (late Early Eocene,  
382 Tunisia) estimated to have weighed ~ 13 g (Tabuce et al., 2007). Postcranial remains indicate  
383 micro-cursoriality (Tabuce et al., 2007). For example, the pulley-shape and the semicircular  
384 crests of the astragalar trochlea, and the calcaneus lengthened proximally and distally to  
385 subtarsal joints, are characteristics of fast running speeds and lateral stability (Tabuce et al.,  
386 2007). However, without postcranial data for stem macroscelids, the origin of micro-

387 cursoriality in macroscelids cannot at present be reliably dated to earlier than the Early  
388 Eocene.

389         Prior to the flourishing of the Paleocene archaic mammals (Alroy, 1998; Yuanqing et  
390 al., 2007), some of which attained very large body sizes (Alroy, 1998; Alroy et al., 2000), the  
391 earliest Paleocene mammals were *de facto* small-bodied forest dwellers. Small body sizes  
392 were retained by macroscelids into the Eocene, as discussed for *Chambius*. Thus the  
393 macroscelids show the first appearance of micro-cursoriality in a crown Eutherian order  
394 (Tabuce et al., 2007). It is estimated that the two subfamilies of elephant shrews,  
395 Macroscelidinae (*Elephantulus*, *Petrodromus* and *Macroscelides*), and Rhynchocyoninae  
396 (*Rhynchocyon*), diverged 26 - 43 mya from a forest-adapted ancestor (Douady et al., 2003;  
397 Smit et al., 2011).

398         The Rhynchocyoninae speciated ~ 8 - 10 mya coincident with Miocene forest  
399 fragmentation induced by aridification (Smit et al., 2011) (Fig. 5). The four recognized  
400 species of *Rhynchocyon* are forest dwellers (Rathbun, 2009). Speciation within  
401 Macroscelidinae commenced ~ 11.5 – 21. mya following dispersal from east Africa to south-  
402 western Africa driven by the aridification of the Sahara and the creation of sub-Saharan arid  
403 corridors, and the emergence of savannas and C<sub>4</sub> grasslands (Fig. 5) (Douady et al., 2003;  
404 Rathbun, 2009; Smit et al., 2011). The Macroscelidinae display more derived cursorial  
405 specializations than *Rhynchocyon*, such as a near two-fold increase in the MT:F ratio (Table 6,  
406 Fig. 1) and smaller body sizes (< 300 g). In the new open African landscapes, predatory  
407 pressures intensified with the influx of modern Carnivora ~ 30 mya when Africa docked with  
408 Europe and Asia (Hedges, 2001). Micro-cursoriality was presumably pre-adaptive in newly  
409 emerging open landscapes with less canopy cover and shelter provided by trees, which  
410 undoubtedly also elevated avian predation. The presence of larger, faster carnivores and avian  
411 predators may have placed upper constraints on the body sizes of the macroscelidids  
412 resulting in the evolution of their smaller sizes (Lovegrove, 2001; Lovegrove and Mowoe,  
413 2013). Smaller body sizes require lower total energy demands and smaller home ranges, thus  
414 reducing daily movement distance requirements and the risk of predation (Garland, 1983a;  
415 Van Damme and Van Dooren, 1999; Blanckenhorn, 2000; Lovegrove, 2001). The  
416 establishment of a system of maintained trails along which the Macroscelidinae run at great  
417 speed also evolved with body size reduction and more open habitats (Rathbun, 2009).

418         Like other cursors (Lovegrove, 2012b), the elevated body temperatures of elephant-  
419 shrews relative to their Afrotherian sister clades (Tenrecidae and Chrysochloridae) are  
420 thought to be linked with cursoriality and the proposed temperature dependence of muscle

421 performance (Clarke and Pörtner, 2010). Selection for  $T_b$  tending towards supraendothermy  
422 ( $T_b > 37.9^\circ\text{C}$ ) (sensu Lovegrove, 2012a) presumably continued until the fitness benefits of  
423 enhanced locomotor capacity were balanced by the costs of the increased metabolic demands  
424 associated with micro-cursoriality. However, in small Macroscelilinae, that is, those with the  
425 highest mass-specific metabolic demands, this tradeoff was optimized through the use of  
426 daily torpor (Lovegrove et al., 1999; Lovegrove et al., 2001a, b; Mzilikazi et al., 2002;  
427 Mzilikazi and Lovegrove, 2004), which profoundly decreases daily energy demands. Daily  
428 torpor is a plesiomorphic characteristic in mammals (Lovegrove, 2012a) and may have been  
429 retained throughout the Cenozoic in elephant-shrews to offset the costs of micro-cursoriality.

430 In conclusion, elephant-shrews are unique mammals in terms of their dramatic  
431 morphological specializations for fast running speeds relative to similar-sized mammals, and  
432 also because they are the only cursors capable of offsetting high locomotor costs through  
433 daily heterothermy. Uniquely too, both of these characteristics are plesiomorphic, indicating a  
434 long history of micro-cursoriality within the Macroscelidea. We propose that micro-  
435 cursoriality evolved in small, ground-dwelling forest macroscelids perhaps as early as the  
436 Paleocene, but long before the proliferation of cursoriality in larger mammals during the  
437 Miocene.

438

#### 439 **Materials and methods**

440

441 Animals were trapped on the farm NoHeep ( $30^\circ 02' \text{ S}$ ,  $17^\circ 59' \text{ E}$ , altitude; 600 – 1000 m), 22  
442 km north-east of Kamieskroon, Namaqualand, South Africa, using Elliot traps baited with a  
443 mixture of peanut butter and rolled oats during July 2011. These two species of *Elephantulus*  
444 are synoptic in this arid, rugged, and highly heterogenous environment in the Kamiesberg  
445 mountains (Boyles et al., 2012). The two species were identified on the basis of  
446 morphological characters that had been verified with genetic analyses at the same study site  
447 (Boyles et al., 2012). Two of the authors of this latter study, Smit and McKechnie, assisted us  
448 in the field with species identifications. After measuring body weights and running speeds on  
449 the same morning of capture and on the following morning, the animals were released after  
450 48 h in the evening at their exact place of capture. The elephant shrews were housed at room  
451 temperature in a farm building during captivity in rodent cages provided with paper toweling  
452 and a refuge tube. They were provided with water and tinned dog food.

453

454 Maximum running speeds were obtained by timing animals as they ran down a 30 m  
tunnel runway erected on a flat section of compacted fine gravel. The tunnel (1.2 m wide, 1.4



455 m high) was formed by U-shaped iron rods (10 mm diameter mild steel) placed every 3 m  
456 and covered with 30% green shade cloth. Along the length of the last 30 m of the tunnel, we  
457 placed three pairs of colour CCD cameras 3 m apart, each pair facing each other, linked to an  
458 eight-channel JPEG2000 digital video recorder. We placed a pile of rocks at the end of the  
459 tunnel and released the animals ~ 20 m from the rocks at the opposite end of the tunnel.  
460 Typically, the animals froze on release, but once they had orientated themselves and had  
461 visually located the rock pile, they ran down the tunnel towards the rock cover. Some animals  
462 were induced to start running with hand-clapping. Each animal was tested during two running  
463 sessions on two consecutive mornings, and on each occasion the individual completed three  
464 runs. Running speeds were calculated from playbacks of video recordings. The success of the  
465 runs was varied. In some cases the animals ran well, but stopped running in the middle of the  
466 tunnel. In other cases the animals ‘bounced’ off the side of the shade cloth tunnel or tried to  
467 climb the sides of the tunnel. For each individual, the ‘best’ run, or the MRS, was taken as the  
468 fastest, uninterrupted run down the full length of the tunnel.

469 We term our data “maximum running speed” only in the sense that these were the  
470 fastest speeds that we measured using our method. Our estimates do not preclude the very  
471 real possibility that higher maximum speeds may be measured in elephant-shrews under more  
472 natural, free-ranging conditions. We suspect that the local knowledge exploited by elephant-  
473 shrews in the employment of their trail systems that they create within their territories  
474 (Rathbun, 2009) probably allows them to attain faster maximum running speeds than those  
475 that we measured.

476

#### 477 *Maximum running speed*

478 Our running speed and body mass data were compared with those of other mammals obtained  
479 from the literature (Garland, 1983a; Hayssen and Lacy, 1985; Robinson and Redford, 1986;  
480 Steudel and Beattie, 1993; Iriarte-Diaz, 2002; Lovegrove, 2003; Rojas et al., 2010) (Table 1,  
481 supplementary information). There has much discussion about the questionable methods used  
482 to measure running speed and hence the quality of the running speed data that have been used  
483 in past analyses (see Garland and Janis, 1993). However, Garland (1993) makes the point that  
484 it is unlikely that the data are biased in any systemic way and that, given the ‘noise’ in the  
485 data, it is “...perhaps surprising that we are able to show *any* significant correlations...” of  
486 MRS with morphological variables. The only species which we discarded from the dataset  
487 was that of the saltatorial Merriam’s kangaroo rat *Dipodomys merriami*. We have cause to  
488 question the unusually high value of the datum, although not necessarily the potentially high



489 MRSs of kangaroo rats *per se*. First, the MRSs of this kangaroo rat were measured when they  
490 were released from traps, using a stopwatch (Kenagy, 1973). Thus the estimate is not  
491 comparable with MRS obtained more precisely when animals were timed as they ran over a  
492 carefully-measured, uniform distance. Second, the MRS of *D. merriami* (31.2 km/h) was  
493 double that of the average MRS (16.0 km/h) for three other species of *Dipodomys* in the data  
494 set.

495 It became obvious during the preliminary data analysis that elephant-shrews display  
496 the most highly-derived, digitigrade cursorial limbs of all mammals smaller than 1 kg. Thus  
497 the mammalian running speed model with which to compare elephant-shrews was not  
498 intuitively obvious. We argue here that there is only one hypothesis that is reasonably  
499 testable, which is simply that the MRS of elephant-shrews exceeds those of mammals of  
500 equivalent body size irrespective of limb morphology. The MRSs of *Elephantulus* (40 - 60 g)  
501 cannot be compared with those of digitigrade mammals, such as carnivores and lagomorphs  
502 (rabbits and hares) which are mostly larger than 1 kg, because their smaller body sizes would  
503 require extrapolation of the digitigrade regression models way beyond the lower bounds of  
504 the regression data. Indeed, the same argument applies to a comparison with unguligrade  
505 mammals although, as we show below, unguligrade mammals do not show the same scaling  
506 pattern of MRS with mass compared with other locomotor modes (Iriarte-Diaz, 2002;  
507 Lovegrove, 2004). To select the best model with which to test the hypothesis we employed  
508 step-wise analyses of the allometric relationship of body mass and maximum running speed  
509 in a phylogenetic context.

510 A phylogeny of all of the species used in the comparisons was compiled using  
511 Mesquite version 2.74 (Maddison and Maddison, 2009) from a variety of sources (De Walt  
512 et al., 1993; Kruckenhauser et al., 1999; Oshida and Masuda, 2000; DeBry and Sagel, 2001;  
513 Herron et al., 2004; Stepan et al., 2004; Bininda-Emonds et al., 2007; Bradley et al., 2007;  
514 Meredith et al., 2008; Montgelard et al., 2008; Lovegrove, 2012a) (see supplementary  
515 information).

516 All statistical analyses were conducted using R version R-3.0.1 (R Core R Core Team,  
517 2012). Since strong inflections have been observed in the scaling with body mass of both  
518 MRS (Garland, 1983a) and RRS (Iriarte-Diaz, 2002), we used piecewise regression  
519 (Crawley, 2007) to establish whether an inflection existed in the relationship between  $\log_{10}$   
520 MRS and  $\log_{10} M_b$ . Data for mammals smaller than and equal to the inflection body mass,  
521 termed hereafter the small mammal dataset, were used for further analyses because this body  
522 size range embraced the elephant-shrew body sizes. Outliers in the regression analysis of the

523 conventional species data of the small mammal data were identified using Cook's Distance  
524 (Cook, 1977) calculated from OLS regressions. Evidence of phylogenetic signal was  
525 estimated using Pagel's  $\lambda$  calculated with the R package 'caper' (Nunn, 2011), and  
526 with Blomberg *et al.*'s (2003)  $K$  statistic using the R packages 'picante' (Kembel *et al.*, 2010)  
527 and 'ape' (Paradis *et al.*, 2004). OLS and PGLS models were fitted to  $\log_{10}$  MRS as a  
528 function of  $\log_{10} M_b$  using the R package 'caper' (Nunn, 2011).

529 To determine whether MRS is influenced by locomotor mode in the small mammal  
530 dataset, we used a multivariate phylogenetic generalized linear model (PGLS) in which the  
531 dependent and independent data were first phylogenetically transformed following the  
532 method of Garland and Ives (2000) as implemented by Outomuro *et al.* (2013). We created a  
533 factor variable ("foot") which coded the data as either plantigrade, lagomorph-like, saltatorial  
534 or digitigrade, and then used a standard multivariate MANCOVA.

535 For the small mammal dataset, two PGLS regressions were calculated; a pure  
536 Brownian motion PGLS with branch length transformation set to  $\lambda = 1$ , and a PGLS with  
537 Pagel's maximum likelihood estimation of branch lengths. The best fit model was determined  
538 as the model with the lowest AIC.

539 To compare the MRS of elephant-shrews with those of similar-sized mammals, we  
540 also computed similar PGLS models for the data for mammals smaller than 500 g ( $n = 52$ ),  
541 termed hereafter the plantigrade dataset. This upper body size limit approximates the 95<sup>th</sup>  
542 percentile of the plantigrade body mass frequency distribution and the intersection between  
543 the plantigrade and digitigrade distributions (Lovegrove, 2000, 2001).

544

#### 545 *Matatarsal:femur ratios*

546 Metatarsal and femur ratios were measured from animals obtained from the same site that  
547 were sacrificed for a genetic study (Boyles *et al.*, 2012). The MT:F data for *Elephantulus*  
548 were compared with those for 135 species of mammal obtained from the literature (Garland  
549 and Janis, 1993; Steudel and Beattie, 1993; Carrano, 1999) (Table 2, supplementary  
550 information). The datum for the giraffe (MT:F ratio = 1.4) was excluded because it was a  
551 very large outlier that had a large leverage influence on the unguligrade regressions (see Fig.  
552 1). As described earlier for MRS, a phylogeny of the species used in the MT:F ratio analyses  
553 was constructed using Mesquite (supplementary information).

554 Initial plots of the relationship between MT:F ratio and  $\log_{10} M_b$  revealed obviously  
555 dichotomous allometric relationships; one unique to unguligrade mammals (Artiodactyla and  
556 Perrisodactyla), and another to non-unguligrade mammals, which in this dataset included

557 Carnivora, Rodentia, Lagomorpha, Lipotyphla, marsupials, and a monotreme. OLS and  
558 PGLS regressions were fitted to the complete dataset, and to the unguligrade and non-  
559 unguligrade data separately, as described above for the MRS analyses.

560

#### 561 *Tibiofibula outlines*

562 The outlines of the synostosed tibiofibula of an unnamed Nearctic leptictid (Rose, 1999),  
563 *Leptictis dakaotensis* (Rose, 2006), (*Apheliscus*) (Zack et al., 2005b), an extant *Rhynchocyon*  
564 (Rose, 1999), were digitized from published graphics. The outlines for *Elephantulus rupestris*  
565 were digitized from a photograph taken during the measurement of the MT:F ratios.

566

#### 567 **Acknowledgements**

568

569 We are very grateful to those entertaining volunteers who assisted in trapping and identifying  
570 elephant-shrews and measuring their running performances in Namaqualand; Andrew  
571 McKechnie, Ben Smit, Danielle Levesque, Keri Lobban, and Ezit Malan. We thank Pieter  
572 and Verencia Benade for permission to work on their farm Noheep, Namaqualand. We are  
573 grateful to Galen Rathbun and Danielle Levesque for providing comments on the draft  
574 manuscript. This study was financed by incentive grants to BGL from the University of  
575 KwaZulu-Natal and the National Research Foundation. BGL and MM collected and analyzed  
576 the data, and BGL wrote the bulk of the manuscript.

577

578

**Table 1.** Bone dimensions and maximum running speeds of *Elephantulus rupestris* and *E. edwardii*.

|                                        | <i>E. rupestris</i>   | <i>E. edwardii</i>    |
|----------------------------------------|-----------------------|-----------------------|
| Body mass (g)                          | 60.10 ± 5.02 (n = 10) | 49.90 ± 4.22 (n = 4)  |
| Femur length (mm)                      | 26.54 ± 0.69 (n = 5)  | 26.13 ± 0.38 (n = 5)  |
| Metatarsal length (mm)                 | 26.68 ± 1.15 (n = 5)  | 24.54 ± 1.26 (n = 5)  |
| MT:F                                   | 1.067 ± 0.041 (n = 5) | 1.075 ± 0.042 (n = 5) |
| MRS: max absolute running speed (km/h) | 23.6 ± 4.8 (n = 10)   | 19.4 ± 2.2 (n = 4)    |
| MRS range (km/h)                       | 14.4 - 28.8           | 10.8 - 21.6           |

579

580

581 **Table 2.** Statistics of various regression models fitted to data sets of metatarsal:femur ratio as  
 582 a function of  $\log_{10}$  body mass (kg).

| Statistics                       | OLS           | PGLS<br>Brownian | PGLS<br>ML        |
|----------------------------------|---------------|------------------|-------------------|
| All mammals (n = 135)            |               |                  |                   |
| Slope                            | 0.073         | -0.042           | -0.040            |
| <i>P</i>                         | < 0.001       | < 0.01           | < 0.01            |
| Intercept                        | 0.479         | 0.448            | 0.449             |
| $R^2$                            | 0.138         | 0.064            | 0.057             |
| Pagel's <i>lambda</i>            | $\lambda = 0$ | $\lambda = 1$    | $\lambda = 0.964$ |
| AIC                              | -16.2         | -216.6           | -221.6            |
| Unguligrade mammals (n = 56)     |               |                  |                   |
| Slope                            | -0.237        | -0.124           | -0.124            |
| <i>P</i>                         | < 0.001       | < 0.001          | < 0.001           |
| Intercept                        | 1.252         | 0.919            | 0.919             |
| $R^2$                            | 0.327         | 0.193            | 0.193             |
| Pagel's <i>lambda</i>            | $\lambda = 0$ | $\lambda = 1$    | $\lambda = 1$     |
| AIC                              | -26.2         | -81.1            | -81.1             |
| Non-unguligrade mammals (n = 79) |               |                  |                   |
| Slope                            | -0.020        | -0.033           | -0.031            |
| <i>P</i>                         | 0.029         | 0.024            | < 0.01            |
| Intercept                        | 0.410         | 0.338            | 0.357             |
| $R^2$                            | 0.061         | 0.064            | 0.089             |
| Pagel's <i>lambda</i>            | $\lambda = 0$ | $\lambda = 1$    | 0.589             |
| AIC                              | -157.8        | -146.7           | -177.5            |

583

584

585 **Table 3.** Statistics of randomization tests used to detect phylogenetic signal ( $K$ ) (Blomberg et  
 586 al., 2003) in the data for body mass, maximum running speed, and MT:F ratio.

| Trait                                                        | N  | $K$   | Variance<br>of $K$ | Mean<br>random<br>$K$ | $Z$   | Randomization<br>test probability<br>( $p$ ) |
|--------------------------------------------------------------|----|-------|--------------------|-----------------------|-------|----------------------------------------------|
| <sup>a</sup> Log <sub>10</sub> M <sub>b</sub> for MRS        | 80 | 1.328 | 0.008              | .041                  | 8.036 | < 0.001                                      |
| <sup>a</sup> Log <sub>10</sub> residual MRS                  | 80 | 0.360 | < 0.001            | 0.001                 | 4.041 | < 0.001                                      |
| <sup>b</sup> Log <sub>10</sub> M <sub>b</sub> for MT:F ratio | 56 | 0.482 | 0.044              | 0.133                 | 4.055 | < 0.001                                      |
| <sup>b</sup> Log <sub>10</sub> residual MT:F                 | 56 | 0.772 | 0.003              | 0.015                 | 4.589 | < 0.001                                      |
| <sup>c</sup> Log <sub>10</sub> M <sub>b</sub> for MT:F ratio | 79 | 0.580 | 0.142              | 0.571                 | 5.688 | < 0.001                                      |
| <sup>c</sup> Log <sub>10</sub> residual MT:F                 | 79 | 0.397 | 0.002              | 0.004                 | 2.875 | < 0.01                                       |

587 <sup>a</sup>80 mammals species < 20 kg, <sup>b</sup>56 unguligrade species, <sup>c</sup>76 non-unguligrade species.

588

589

590

**Table 4.** Statistics of multivariate MANOVA analyses testing the influence of body mass and locomotor mode on the maximum running speeds of mammals smaller than 20 kg.

| Variable                     | df | SS    | MS    | F      | p       |
|------------------------------|----|-------|-------|--------|---------|
| Non-PGLS multivariate MANOVA |    |       |       |        |         |
| $\text{Log}_{10}M_b$         | 1  | 4.002 | 4.002 | 234.74 | < 0.001 |
| Locomotor mode               | 3  | 0.613 | 0.204 | 11.99  | < 0.001 |
| Residuals                    | 75 | 1.289 | 0.017 |        |         |
| PGLS multivariate MANOVA     |    |       |       |        |         |
| $\text{Log}_{10}M_b$         | 1  | 0.144 | 0.144 | 28.17  | < 0.001 |
| Locomotor mode               | 2  | 0.007 | 0.003 | 0.66   | 0.521   |
| Residuals                    | 76 | 0.388 | 0.005 |        |         |

591



592

593 **Table 5.** Statistics of various regression models fitted to the small mammal data set of  $\log_{10}$ 594 MRS (km/h) as a function of  $\log_{10}$  body mass (kg) (n = 80 species).

| <b>Statistics</b>                                                          | <b>OLS</b>    | <b>PGLS<br/>Brownian</b> | <b>PGLS<br/>ML</b> |
|----------------------------------------------------------------------------|---------------|--------------------------|--------------------|
| Mammals < 20 kg (n = 80), including all locomotor modes except unguligrade |               |                          |                    |
| Slope                                                                      | 0.232         | 0.150                    | 0.167              |
| Intercept                                                                  | 1.436         | 1.384                    | 1.393              |
| R <sup>2</sup>                                                             | 0.685         | 0.255                    | 0.328              |
| Pagel's <i>lambda</i>                                                      | $\lambda = 0$ | 1                        | $\lambda = 0.905$  |
| AIC                                                                        | -68.44        | -87.32                   | -93.46             |
| Plantigrade mammals < 500 g (n = 52)                                       |               |                          |                    |
| Slope                                                                      | 0.138         | 0.052                    | 0.138              |
| Intercept                                                                  | 1.305         | 1.172                    | 1.304              |
| R <sup>2</sup>                                                             | 0.254         | 0.033                    | 0.254              |
| Pagel's <i>lambda</i>                                                      | 0             | 1                        | 0                  |
| AIC                                                                        | -77.10        | -65.18                   | -79.10             |

595

596

597

598

599

600

**Table 6.** The metatarsal:femur ratios (MT:F) and habitats of extant macroscelids and their putative condylarth Leptictid ancestors.

| Species                           | MT:F | Habitat              | Reference                      |
|-----------------------------------|------|----------------------|--------------------------------|
| <b>Extant macroscelids</b>        |      |                      |                                |
| <i>Elephantulus edwardii</i>      | 1.08 | Open, rocky desert   | This study                     |
| <i>Elephantulus rupestris</i>     | 1.07 | Open, rocky desert   | This study                     |
| <i>Elephantulus proboscideus</i>  | 1.00 | Open, desert         | (Carrano, 1999; Rathbun, 2009) |
| <i>Elephantulus rozetti</i>       | 0.71 | Open, rocky desert   | (Evans, 1942; Rathbun, 2009)   |
| <i>Elephantulus brachyrhyncus</i> | 0.62 | Savanna, woodland    | (Carrano, 1999)                |
| <i>Petrodromus tetradactylus</i>  | 0.61 | Closed forest        | (Evans, 1942; Rathbun, 2009)   |
| <i>Rhynchocyon petersi</i>        | 0.56 | Closed forest        | (Carrano, 1999; Rathbun, 2009) |
| <i>Rhynchocyon cirnei</i>         | 0.55 | Closed forest        | (Evans, 1942; Rathbun, 2009)   |
| <b>Leptictida</b>                 |      |                      |                                |
| <i>Leptictis dakotensis</i>       | 0.41 | Oligocene forests    | (Rose, 2006)                   |
| <i>Leptictidium</i>               | 0.47 | Eocene forests       | (Rose, 2006)                   |
| <i>Prodiacodon tauricinerei</i>   | 0.46 | Early Eocene forests | (Rose, 1999)                   |

601

602

603 **References**

604

- 605 **Alroy, J.** (1998). Cope's Rule and the dynamics of body mass evolution in North American fossil  
606 mammals. *Sci.* **280**, 731-734.
- 607 **Alroy, J., Koch, P. L. and Zachos, J. C.** (2000). Global climate change and North American mammalian  
608 evolution. *Paleobiology* **26**, 259-288.
- 609 **Bininda-Emonds, O. R. P., Cardillo, M., Jones, K. E., Macphee, R. D. E., Beck, R. M. D., Grenyer, R.,  
610 Price, S. A., Vos, R. A., Gittleman, J. L. and Purvis, A.** (2007). The delayed rise of present-day  
611 mammals. *Nat.* **446**, 507-512.
- 612 **Blanckenhorn, W. U.** (2000). The evolution of body size: What keeps organisms small? *Q. Rev. Biol.*  
613 **75**, 385-407.
- 614 **Blomberg, S. P., Garland, T. and Ives, A. R.** (2003). Testing for phylogenetic signal in comparative  
615 data: behavioural traits are more labile. *Evol.* **57**, 717-745.
- 616 **Blomberg, S. P., Lefevre, J. G., Wells, J. A. and Waterhouse, M.** (2012). Independent contrasts and  
617 PGLS regression estimators are equivalent. *Syst. Biol.* **61**, 382-391.
- 618 **Boyles, J. G., Smit, B., Sole, C. L. and McKechnie, A. E.** (2012). Body temperature patterns in two  
619 syntopic elephant shrew species during winter. *Comp. Biochem. Physiol. A* **161**, 89-94.
- 620 **Bradley, R. D., Durish, N. D., Rogers, D. S., Miller, J. R., Engstrom, M. D. and Kilpatrick, C. W.** (2007).  
621 Toward a molecular phylogeny for *Peromyscus*: Evidence from mitochondrial cytochrome-b  
622 sequences. *J. Mamm.* **88**, 1146-1159.
- 623 **Butler, P. M.** (1995). Fossil Macroscelidea. *Mammal Rev.* **25**, 3-14.
- 624 **Carrano, M. T.** (1999). What, if anything, is a cursor? Categories versus continua for determining  
625 locomotor habit in mammals and dinosaurs. *J. Zool, Lond.* **247**, 29-42.
- 626 **Clarke, A. and Pörtner, H.-O.** (2010). Temperature, metabolic power and the evolution of  
627 endothermy. *Biol. Rev.* **85**, 703-727.
- 628 **Cook, R. D.** (1977). Detection of influential observation in linear regression. *Technometrics* **19**, 15-18.
- 629 **Crawley, M. J.** (2007). *The R Book*. Sussex, England: John Wiley & Sons Ltd.
- 630 **De Walt, T. S., Zimmerman, E. G. and Planz, J. V.** (1993). Mitochondrial-DNA phylogeny of species of  
631 the *boylei* and *truei* groups of the genus *Peromyscus* *J. Mamm.* **74**, 352-362.
- 632 **DeBry, R. W. and Sagel, R. M.** (2001). Phylogeny of Rodentia (Mammalia) inferred from the nuclear-  
633 encoded gene IRBP. *Mol. Phyl. Evol.* **19**, 290-301.
- 634 **Douady, C. J., Catzeflis, F., Raman, J., Springer, M. S. and Stanhope, M. J.** (2003). The Sahara as a  
635 vicariant agent, and the role of Miocene climatic events, in the diversification of the mammalian  
636 order Macroscelidea (elephant shrews). *Proc. Natl. Acad. Sci. USA* **100**, 8325-8330.
- 637 **Edwards, E. J., Osborne, C. P., Stromberg, C. A. E., Smith, S. A., Bond, W. J., Christin, P. A., Cousins,  
638 A. B., Duvall, M. R., Fox, D. L., Freckleton, R. P. et al.** (2010). The origins of C<sub>4</sub> grasslands: Integrating  
639 evolutionary and ecosystem science. *Sci.* **328**, 587-591.
- 640 **Evans, F. G.** (1942). The osteology and relationships of the elephant shrews (Macroscelididae). *B.*  
641 *Am. Mus. Nat. Hist.* **80**, 80-125.
- 642 **Figuerido, B., Janis, C. M., Perez-Claros, J. A., De Renzi, M. and Palmqvist, P.** (2012). Cenozoic  
643 climate change influences mammalian evolutionary dynamics. *Proc. Nat. Acad. Sciences, USA* **109**,  
644 722-727.
- 645 **Garland, T.** (1983a). The relation between maximal running speed and body mass in terrestrial  
646 mammals. *J. Zool.* **199**, 157-170.
- 647 **Garland, T.** (1983b). Scaling the ecological cost of transport to body mass in terrestrial mammals.  
648 *The American Naturalist* **121**, 571-587.
- 649 **Garland, T. and Janis, C. M.** (1993). Does metatarsal/femur ratio predict maximal running speed in  
650 cursorial mammals? *J. Zool.* **229** 133-151.

- 651 **Garland, T. and Ives, A. R.** (2000). Using the past to predict the present: confidence intervals for  
652 regression equations in phylogenetic comparative methods. *Am. Nat.* **155**, 346-365.
- 653 **Hayssen, V. and Lacy, R. C.** (1985). Basal metabolic rates in mammals: taxonomic differences in the  
654 allometry of BMR and body mass. *Comp. Biochem. Physiol.* **81A**, 741-754.
- 655 **Hedges, S. B.** (2001). Afrotheria: plate tectonics meets genomics. *P. Natl. Acad. Sci.-Biol.* **98**, 1-2.
- 656 **Herron, M. D., Castoe, T. A. and Parkinson, C. L.** (2004). Sciurid phylogeny and the paraphyly of  
657 Holarctic ground squirrels (*Spermophilus*). *Mol. Phyl. Evol.* **31**, 1015-1030.
- 658 **Hildebrand, M.** (1974). Analysis of vertebrate structure. New York: John Wiley & Sons.
- 659 **Hooker, J. J. and Russell, D. E.** (2012). Early Palaeogene Louisinidae (Macroscelidea, Mammalia),  
660 their relationships and north European diversity. *Zool. J. Linn. Soc.* **164**, 856-936.
- 661 **Iriarte-Diaz, J.** (2002). Differential scaling of locomotor performance in small and large terrestrial  
662 mammals. *J. Exp. Biol.* **205**, 2897-2908.
- 663 **Janis, C. M.** (1993). Tertiary mammal evolution in the context of changing climates, vegetation, and  
664 tectonic events. *Annu. Rev. Ecol. Syst.* **24**, 467-500.
- 665 **Janis, C. M. and Wilhelm, P. D.** (1993). Were there mammalian pursuit predators in the Tertiary?  
666 Dances with wolf avatars. *J. Mamm. Evol.* **1**, 103-125.
- 667 **Jardine, P. E., Janis, C. M., Sahney, S. and Benton, M. J.** (2012). Grit not grass: Concordant patterns  
668 of early origin of hypsodonty in Great Plains ungulates and Glires. *Palaeogeogr., Palaeoclimatol.,*  
669 *Palaeoecol.* **365**, 1-10.
- 670 **Jones, K. E. and Purvis, A.** (1997). An optimum body size for mammals? Comparative evidence from  
671 bats. *Funct. Ecol.* **11**, 751-756.
- 672 **Kembel, S. W., Cowan, P. D., Helmus, M. R., Cornwell, W. K., Morlon, H., Ackerly, D. D., Blomberg,**  
673 **S. P. and Webb, C. O.** (2010). Picante: R tools for integrating phylogenies and ecology. *Bioinformatics*  
674 **26**, 1463-1464.
- 675 **Kenagy, G. J.** (1973). Daily and seasonal patterns of activity and energetics in a heteromyid rodent  
676 community. *Ecology* **54(6)**, 1201-1219.
- 677 **Kruckenhauser, L., Pinsker, W. and Arnold, W.** (1999). Marmot phylogeny revisited: molecular  
678 evidence for a diphyletic origin of sociality. *J. Zool. Syst. Evol. Research* **37**, 49-56.
- 679 **Lovegrove, B. G.** (2000). The zoogeography of mammalian basal metabolic rate. *Am. Nat.* **156**, 201-  
680 219.
- 681 **Lovegrove, B. G.** (2001). The evolution of body armor in mammals: plantigrade constraints of large  
682 body size. *Evol.* **55**, 1464-1473.
- 683 **Lovegrove, B. G.** (2003). The influence of climate on the basal metabolic rate of small mammals: a  
684 slow-fast metabolic continuum. *J. Comp. Physiol. B* **173**, 87-112.
- 685 **Lovegrove, B. G.** (2004). Locomotor mode, maximum running speed and basal metabolic rate in  
686 placental mammals. *Physiol. Biochem. Zool.* **77**, 916-928.
- 687 **Lovegrove, B. G.** (2012a). The evolution of endothermy in Cenozoic mammals: A plesiomorphic-  
688 apomorphic continuum. *Biol. Rev.* **87**, 128-162.
- 689 **Lovegrove, B. G.** (2012b). The evolution of mammalian body temperature: the Cenozoic  
690 supraendothermic pulses. *J. Comp. Physiol. B* **182**, 579-589.
- 691 **Lovegrove, B. G. and Haines, L.** (2004). The evolution of placental mammal body sizes: Evolutionary  
692 history, form, and function. *Oecol.* **138**, 13-27.
- 693 **Lovegrove, B. G. and Mowoe, M. O.** (2013). The evolution of mammal body sizes: responses to  
694 Cenozoic climate change in North American mammals. *J. Evol. Biol.* **26**, 1317-1329.
- 695 **Lovegrove, B. G., Lawes, M. J. and Roxburgh, L.** (1999). Confirmation of plesiomorphic daily torpor  
696 in mammals: the round-eared elephant shrew *Macroscelides proboscideus* (Macroscelidea). *J.*  
697 *Comp. Physiol. B* **169**, 453-460.
- 698 **Lovegrove, B. G., Raman, J. and Perrin, M. R.** (2001a). Heterothermy in elephant shrews,  
699 *Elephantulus* spp. (Macroscelidea): daily torpor or hibernation? *J. Comp. Physiol. B* **171**, 1-10.
- 700 **Lovegrove, B. G., Raman, J. and Perrin, M. R.** (2001b). Daily torpor in elephant shrews  
701 (Macroscelidea: *Elephantulus* spp.) in response to food deprivation. *J. Comp. Physiol. B* **171**, 11-21.

- 702 **MacFadden, B. J.** (2000). Cenozoic mammalian herbivores from the Americas: Reconstructing  
703 ancient diets and terrestrial communities. *Annu. Rev. Ecol. Syst.* **31**, 33-59.
- 704 **Maddison, W. P. and Maddison, D. R.** (2009). Mesquite: a modular system for evolutionary analysis.  
705 Version 1.12.
- 706 **Meredith, R. W., Westerman, M. and Springer, M. S.** (2008). A phylogeny and timescale for the  
707 living genera of kangaroos and kin (Macropodiformes : Marsupialia) based on nuclear DNA  
708 sequences. *Aust. J. Zool.* **56**, 395-410.
- 709 **Montgelard, C., Forty, E., Arnal, V. and Matthee, C. A.** (2008). Suprafamilial relationships among  
710 Rodentia and the phylogenetic effect of removing fast-evolving nucleotides in mitochondrial, exon  
711 and intron fragments. *BMC Evol. Biol.* **8**, 231.
- 712 **Mzilikazi, N. and Lovegrove, B. G.** (2004). Daily torpor in free-ranging rock elephant shrews,  
713 *Elephantulus myurus* : a year-long study. *Physiol. Biochem. Zool.* **77**, 285-296.
- 714 **Mzilikazi, N., Lovegrove, B. G. and Ribble, D. O.** (2002). Exogenous passive heating during arousal in  
715 free-ranging rock elephant shrews, *Elephantulus myurus*. *Oecol.* **133**, 307-314.
- 716 **Nunn, C.** (2011). The comparative approach in evolutionary anthropology and biology. Chicago:  
717 University of Chicago Press.
- 718 **O'Leary, M. A., Bloch, J. I., Flynn, J. J., Gaudin, T. J., Giallombardo, A., Giannini, N. P., Goldberg, S.**  
719 **L., Kraatz, B. P., Luo, Z. X., Meng, J. et al.** (2013). The placental mammal ancestor and the post-K-Pg  
720 radiation of placentals. *Sci.* **339**, 662-667.
- 721 **Oshida, T. and Masuda, R.** (2000). Phylogeny and zoogeography of six squirrel species of the genus  
722 *Sciurus* (Mammalia, Rodentia), inferred from cytochrome b gene sequences. *Zool.Sci.* **17**, 405-409.
- 723 **Outomuro, D., Adams, D. C. and Johansson, F.** (2013). Evolution of wing shape in ornamented-  
724 winged damselflies. *Evolutionary Biology* (in press).
- 725 **Paradis, E., Claude, J. and Strimmer, K.** (2004). APE: Analyses of Phylogenetics and Evolution in R  
726 language. *Bioinformatics* **20**, 289-290.
- 727 **R Core Team.** (2012). R: A language and environment for statistical computing. In *R Foundation for*  
728 *Statistical Computing, Vienna, Austria* (<http://www.R-project.org>).
- 729 **Rathbun, G. B.** (1979). The social structure and ecology of elephant-shrews. Berlin: Paul Parey.
- 730 **Rathbun, G. B.** (2009). Why is there discordant diversity in sengi (Mammalia: Afrotheria:  
731 Macroscelidea) taxonomy and ecology? *Afr. J. Ecol.* **47**, 1-13.
- 732 **Robinson, J. G. and Redford, K. H.** (1986). Body size, diet, and population density of Neotropical  
733 forest mammals. *Am. Nat.* **128**, 665-680.
- 734 **Rojas, A. D., Körtner, G. and Geiser, F.** (2010). Do implanted transmitters affect maximum running  
735 speed of two small marsupials? *J. Mamm.* **91**, 1360-1364.
- 736 **Rookmaker, L. C.** (1989). The Zoological Exploration of Southern Africa. Rotterdam: A.A. Balkema.
- 737 **Rose, K. D.** (1999). Postcranial skeleton of Eocene Leptictidae (Mammalia), and its implications for  
738 behavior and relationships. *J. Vert. Paleontol.* **19**, 355-372.
- 739 **Rose, K. D.** (2006). The postcranial skeleton of early Oligocene *Leptictis* (Mammalia: Leptictida), with  
740 a preliminary comparison to *Leptictidium* from the middle Eocene of Messel. *Palaeontogr. Ab. A* **278**,  
741 37-56.
- 742 **Secord, R., Bloch, J. I., Chester, S. G. B., Boyer, D. M., Wood, A. R., Wing, S. L., Kraus, M. J.,**  
743 **McInerney, F. A. and Krigbaum, J.** (2012). Evolution of the earliest horses driven by climate change  
744 in the Paleocene-Eocene Thermal Maximum. *Sci.* **335**, 959-962.
- 745 **Smit, H. A., van Vuuren, B. J., O'Brien, P. C. M., Ferguson-Smith, M., Yang, F. and Robinson, T. J.**  
746 (2011). Phylogenetic relationships of elephant-shrews (Afrotheria, Macroscelididae). *J. Zool.* **284**,  
747 133-143.
- 748 **Smith, F. A. and Lyons, S. K.** (2011). How big should a mammal be? A macroecological look at  
749 mammalian body size over space and time. *Phil. Trans. Roy. Soc. Lond. B* **366**, 2364-2378.
- 750 **Springer, M. S., Cleven, G. C., Madsen, O., de Jong, W. W., Waddell, V. G., Amrine, H. M. and**  
751 **Stanhope, M. J.** (1997). Endemic African mammals shake the phylogenetic tree. *Nat.* **388**, 61-64.

- 752 **Stanhope, M. J., Waddell, V. G., Madsen, O., de Jong, W. W., Hedges, S. B. and Cleven, G. C.** (1998).  
753 Molecular evidence for multiple origins of Insectivora and for a new order of endemic African  
754 insectivorous mammals. *Proc. Nat. Acad. Sci. Usa* **95**, 9972.
- 755 **Stein, B. R. and Casinos, A.** (1997). What is a cursorial mammal? *J. Zool.* **242**, 185-192.
- 756 **Steppan, S. J., Adkins, R. M. and Anderson, J.** (2004). Phylogeny and divergence-date estimates of  
757 rapid radiations in muroid rodents based on multiple nuclear genes. *Syst. Biol.* **53** 533-553.
- 758 **Steudel, K. and Beattie, J.** (1993). Scaling of cursoriality in mammals. *J. Morphol.* **217**, 55-63.
- 759 **Tabuce, R., Coiffait, B., Coiffait, P. E., Mahboubi, M. and Jaeger, J. J.** (2001). A new genus of  
760 Macroscelidea (Mammalia) from the Eocene of Algeria: A possible origin for elephant-shrews. *J. Vert.*  
761 *Paleontol.* **21**, 535-546.
- 762 **Tabuce, R., Marivaux, L., Adaci, M., Bensalah, M., Hartenberger, J. L., Mahboubi, M., Mebrouk, F.,**  
763 **Tafforeau, P. and Jaeger, J. J.** (2007). Early tertiary mammals from north Africa reinforce the  
764 molecular Afrotheria clade. *Proc. R. Soc. B* **274**, 1159-1166.
- 765 **Taylor, C. R., Schmidt-Nielsen, K. and Raab, J. L.** (1970). Scaling of energetic cost of running to body  
766 size in mammals. *American Journal of Physiology* **219**, 1104-1107.
- 767 **Thewissen, J. G. M.** (1990). Evolution of Paleocene and Eocene Phenacodontidae (Mammalia,  
768 Condylarthra). *University of Michigan Papers on Paleontology* **29**, 1-120.
- 769 **Van Damme, R. and Van Dooren, T. J. M.** (1999). Absolute versus per unit body length speed of prey  
770 as an estimator of vulnerability to predation. *Anim. Behav.* **57**, 347-352.
- 771 **Yuanqing, W., Jin, M., Xijun, N. and Chuankui, L.** (2007). Major events of Paleogene mammal  
772 radiation in China. *Geol. J.* **42**, 415-430.
- 773 **Zack, S. P., Penkrot, T. A., Krause, D. W. and Maas, M. C.** (2005a). A new apheliscine "condylarth"  
774 mammal from the late Paleocene of Montana and Alberta and the phylogeny of "hyopsodontids".  
775 *Acta Palaeontol. Pol.* **50**, 809-830.
- 776 **Zack, S. P., Penkrot, T. A., Bloch, J. I. and Rose, K. D.** (2005b). Affinities of 'hyopsodontids' to  
777 elephant shrews and a Holarctic origin of Afrotheria. *Nat.* **434**, 497-501.
- 778

779 **Figure legends**

780

781 **Figure 1**

782 The metatarsal:fermur ratios (MT:F) of 135 mammal species plotted as function of  $\log_{10}$  body  
783 mass. The red line is the PGLS regression line for the combined dataset, whereas the black  
784 and the blue lines are the PGLS regression lines for the separate unguligrade and non-  
785 unguligrade datasets, respectively. The red arrow indicates the evolutionary trend of  
786 decreased body size and increased MT:F ratios that occurred in open habitat *Elephantulus*  
787 species during Miocene aridification.

788

789 **Figure 2**

790 The maximum running speed as a function of body mass of 143 mammal species. The  
791 vertical dashed line indicates a significant inflection at 20 kg separating the allometries of the  
792 MRS of small and large mammals.

793

794 **Figure 3**

795 Maximum running speed as a function of body mass for 80 mammals  $< 20$  kg. The regression  
796 line (solid line) and the 95% confidence (short dashed lines) and prediction (long dashed  
797 lines) intervals were obtained from a Brownian Motion PGLS model, equivalent to an OLS  
798 regression of the phylogenetically independent linear contrasts (see Table 4 for regression  
799 statistics).

800

801 **Figure 4**

802 Maximum running speed as a function of body mass of 52 mammals  $< 500$  g. The regression  
803 line (solid line) and the 95% confidence (long dashed lines) and prediction (short dashed  
804 lines) intervals were obtained from an OLS regression model (see Table 4 for regression  
805 statistics).

806

807 **Figure 5**

808 A working model of the phylogeny of the Macroscelidae and their leptictid ancestors. The  
809 topology of the basal macroscelids follows Hooker and Russel (2012), Zack et al (2005b;  
810 2005a), Butler (1995) and Tabuce et al (2001), whereas that of the traditionally recognized  
811 macroscelid families follows Tabuce et al (2007) and Smit et al (2011). Note that the



812 Aphelidae have recently been recognized as North American ungulates basal to Euungulata  
813 (= crown Perrisodactyla and Artiodactyla) and not as macroselids.

814

815 **Figure 6.**

816 Digitized outlines of the synostosed tibiofibula of an unnamed Nearctic leptictid (Rose,  
817 1999), *Leptictis dakaotensis* (Rose, 2006), (*Apheliscus*) (Zack et al., 2005b), an extant  
818 *Rhynchocyon* (Rose, 1999), and *Elephantulus rupestris* (this study). The degree of distal  
819 synostosis (fusion) is indicative of increased cursorial capacity. Not to scale, but all limbs are  
820 scaled to the same length.

821

822

823 **Supporting information**

824

825 **Figure 1 S1. Body temperatures**

826 **Appendix S1. Phylogeny for maximum MT:F ratio (n = 135)**

827 **Appendix S2. Phylogeny for maximum running speed (n = 80)**

828 **Table 1 S1. Maximum running speed and body mass data**

829 **Table 2 S2. Body mass and metatarsal:femur ratio data**

830

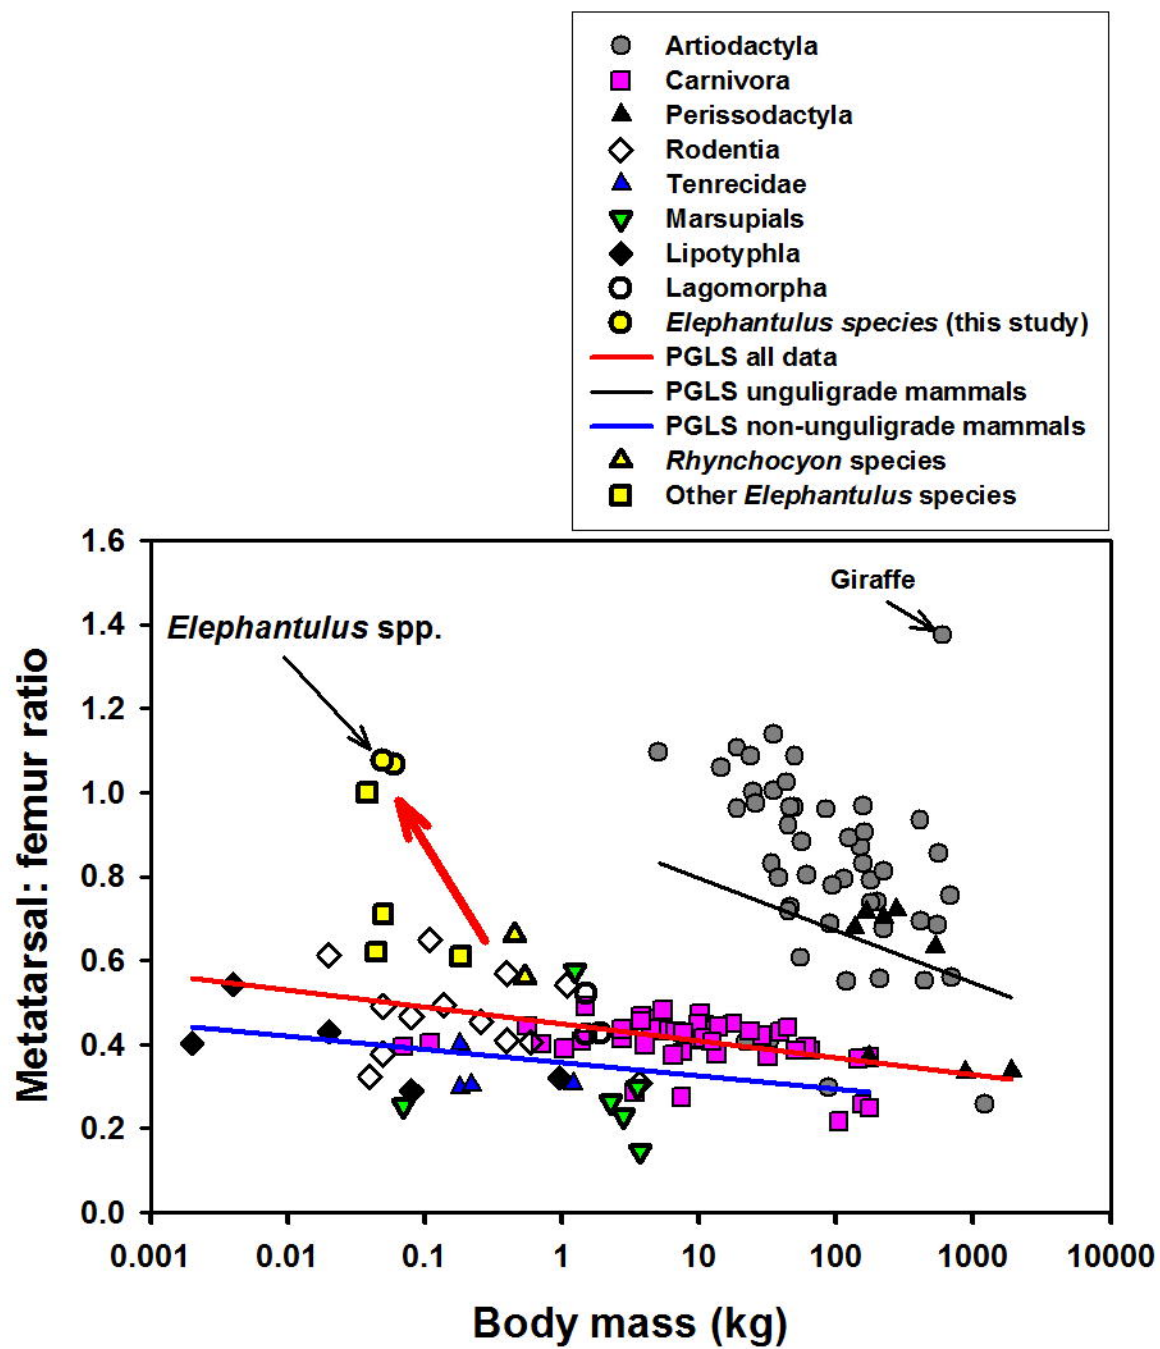

Figure 1

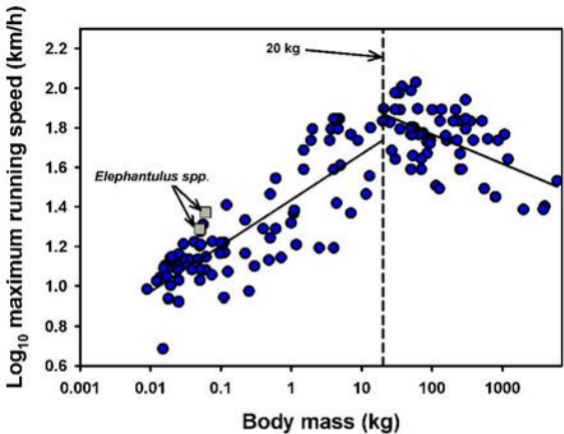

Figure 2: Lovegrove and Mowoe

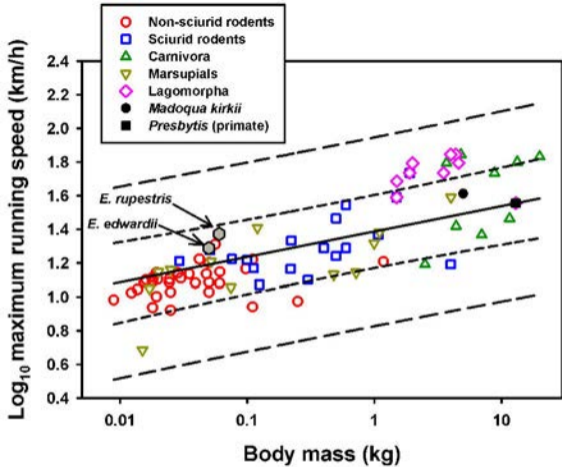

Figure 3

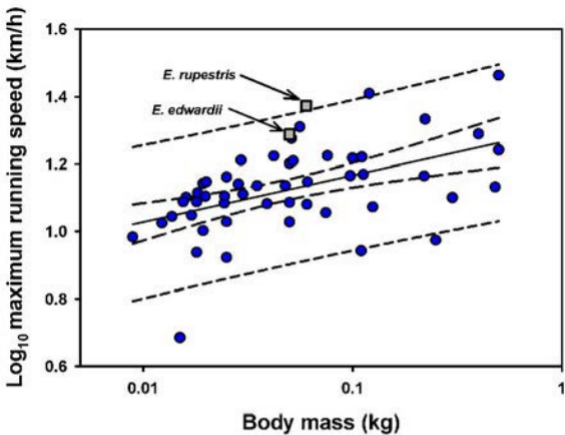

Figure 4

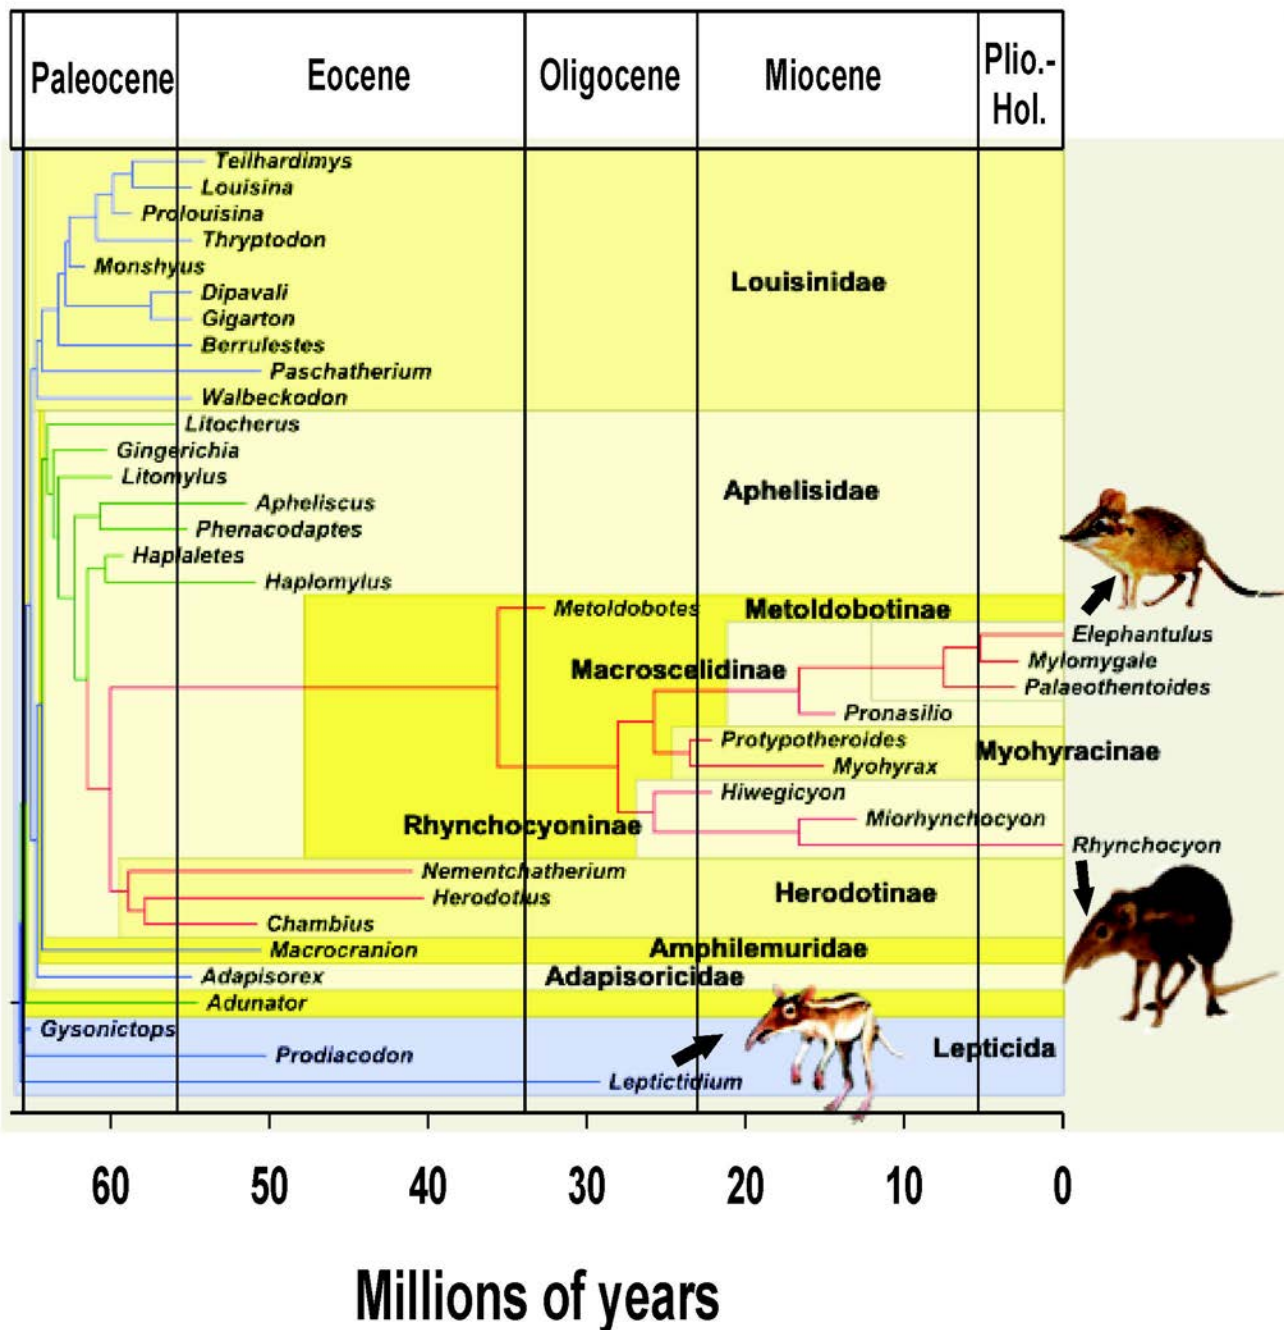

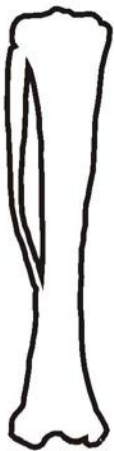

Eocene Nearctic  
Leptictid

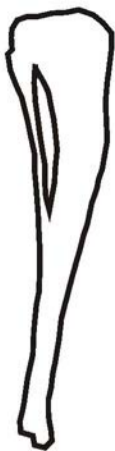

*Leptictis dakotensis*

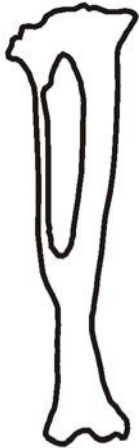

*Apheliscus*

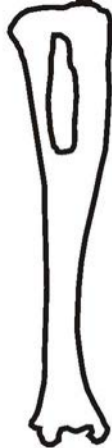

*Rhynchocyon*

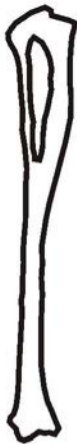

*Elephantulus rupestris*
